# Supplementary material for: Highly sensitive and specific detection of tumor cells based on a split aptamer-triggered dual hybridization chain reaction
Source: Royal Society of Chemistry journal article supplement (doi:10.1039/c9an02476j), 2020-01-01
Supplement: c9an02476j1.pdf [file c9an02476j1.pdf]

## Supporting Information

### Highly sensitive and specific detection of tumor cells based on split aptamer-triggered dual hybridization chain reaction

Baoyin Yuan <sup>a,b,c</sup>, Linyan Guo <sup>a</sup>, Kai Yin <sup>a</sup>, Xinyu Wang <sup>a</sup>, Qian Liu <sup>a</sup>, Meimei He <sup>a</sup>, Kangdong Liu <sup>a,b,c,d,e,\*</sup> and Jimin Zhao <sup>a,b,c,\*</sup>

<sup>a</sup> Department of Pathophysiology, School of Basic Medical Sciences, Zhengzhou University, Zhengzhou, Henan, China

<sup>b</sup> Henan Provincial Cooperative Innovation Center for Cancer Chemoprevention, Zhengzhou, Henan, China

<sup>c</sup> State Key Laboratory of Esophageal Cancer Prevention and Treatment, Zhengzhou University, Zhengzhou, Henan, China

<sup>d</sup> China-US Hormel (Henan) Cancer Institute, Zhengzhou, Henan, China

<sup>e</sup> Cancer Chemoprevention International Collaboration Laboratory, Zhengzhou, Henan, China

\* To whom correspondence should be addressed:

E-mail: kdliu@zzu.edu.cn; zhaojimin@zzu.edu.cn

**Table S1** Sequences of all DNA used in this work. <sup>a</sup>

| Name    | Sequence (5'-3')                                                                                        |
|---------|---------------------------------------------------------------------------------------------------------|
| SA1     | ACTGATTTGCTTGAGCTGAAGATCGTACCGTGAAGTAGACAGT                                                             |
| SA2     | ACTGTCTAGTAGCAAATCAGT                                                                                   |
| ZY11    | TTGACTTGCCACTGACTACCTGGCGCATTGACGTCAGGTTGAGCTGAAG<br>ATCGTACCGTGAAGTCAGTCGGTCGTCATC                     |
| T-SA2   | <b>GACCCTAAGCATAACATCGTCCTTCAT</b> TTTTTACTGTCTAGTAGCAAATCAGT                                           |
| T-SA2-T | <b>GACCCTAAGCATAACATCGTCCTTCAT</b> TTTTTACTGTCTAGTAGCAAATCAGTT<br><b>TTTTTACTTCCTGCTACATACGAATCCCAG</b> |
| H1      | ATGAAGGACGATGTATGCTTAGGGTTCGACTTCCATAGACCCTAAGCATAACAT                                                  |
| H2      | GACCCTAAGCATAACATCGTCCTTCATATGTATGCTTAGGGTCTATGGAAGTC                                                   |
| H3      | TACATACGAATCCCAGATACCTTCAGCTGGGATTCGTATGTAGCAGGAAGTA                                                    |
| H4      | CTGAAGGTATCTGGGATTCGTATGTATACTTCCTGCTACATACGAATCCCAG                                                    |
| Random  | N (64nt)                                                                                                |

<sup>a</sup> The trigger sequences are in blue.

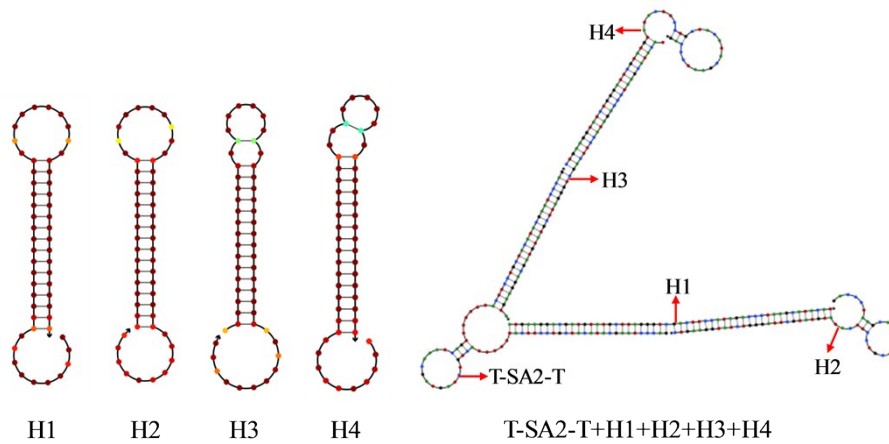

**Fig. S1** Structures of H1, H2, H3, H4 and the dual HCR polymerization initiated by T-SA2-T simulated by the NUPACK software under the experimental conditions.

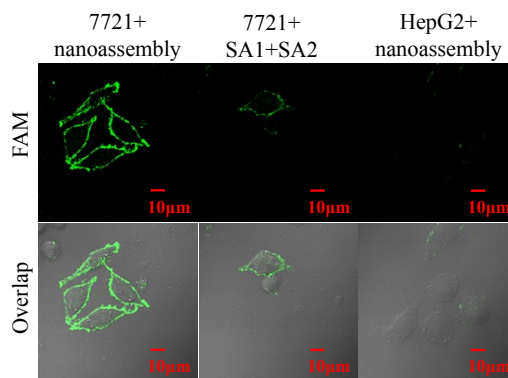

**Fig. S2** Confocal imaging of target 7721 cells incubated with the nanoassembly and SA1+SA2, control HepG2 cells incubated with the nanoassembly. The upper are FAM fluorescence images, the lower are the overlays of the fluorescence channel and the bright-field channel. The fluorescence signal was collected by a 100× objective (fluorescence channel: EX 488 nm, EM 505 nm long-pass). The scale bar is 10 μm.

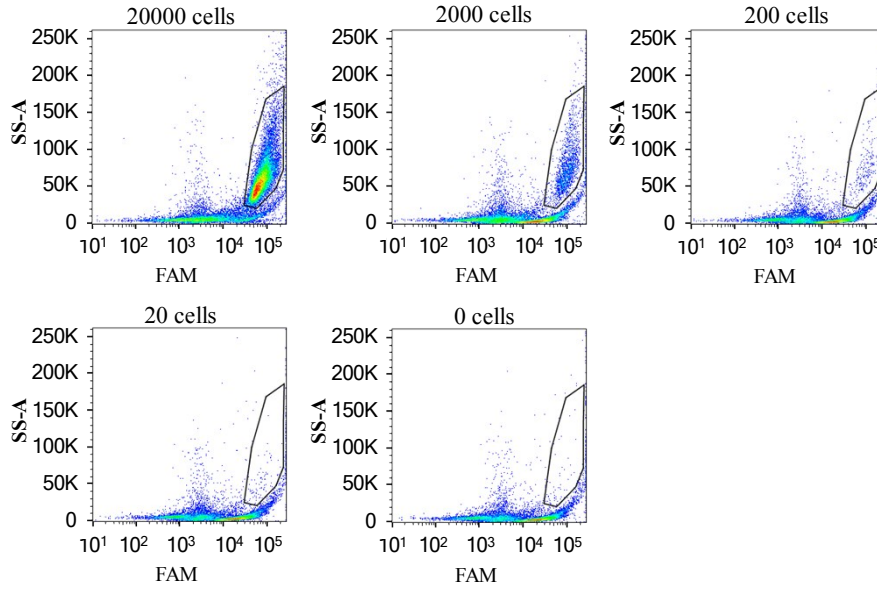

**Fig. S3** Flow cytometry assays of 7721 cells with cell number ranging from 0 to 20,000 in 200  $\mu$ L binding buffer containing 50% human serum by using the dual-HCR strategy. 7721 cells appeared in black frame, and serum fragments located outside black frame.

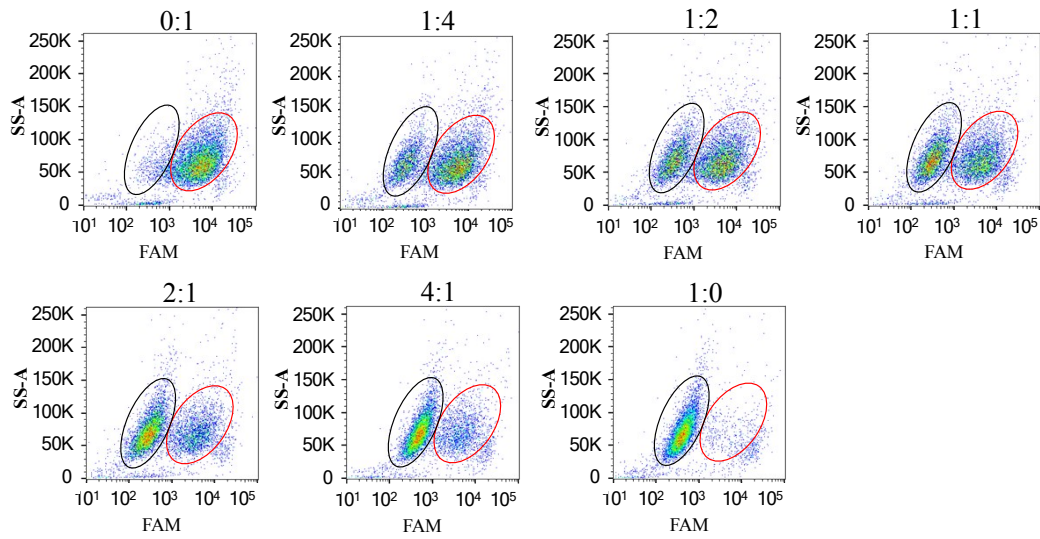

**Fig. S4** Flow cytometry scatter plots of cell mixtures incubated with the nanoassembly. The ratios of control 7404 cells to target 7721 cells were 0:1, 1:4, 1:2, 1:1, 2:1, 4:1 and 1:0. The total number of cells was 100,000 and the final volume was 200  $\mu$ L in each sample.
